# Supplementary material
Source: PubMed Central journal article supplement (PMC2704606)

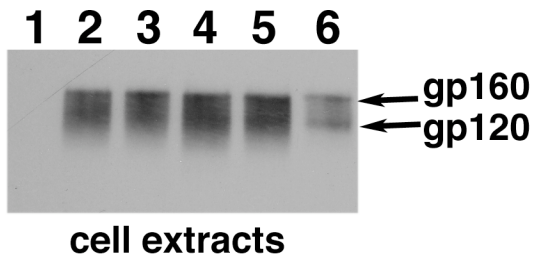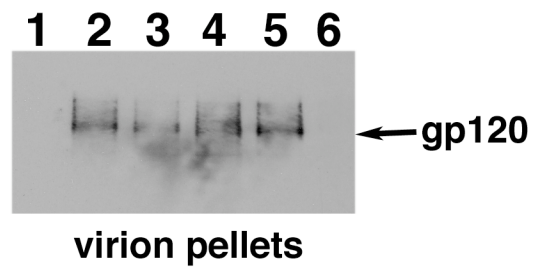

Supplement: NIHMS33674-supplement-03.pdf [file NIHMS33674-supplement-03.pdf]

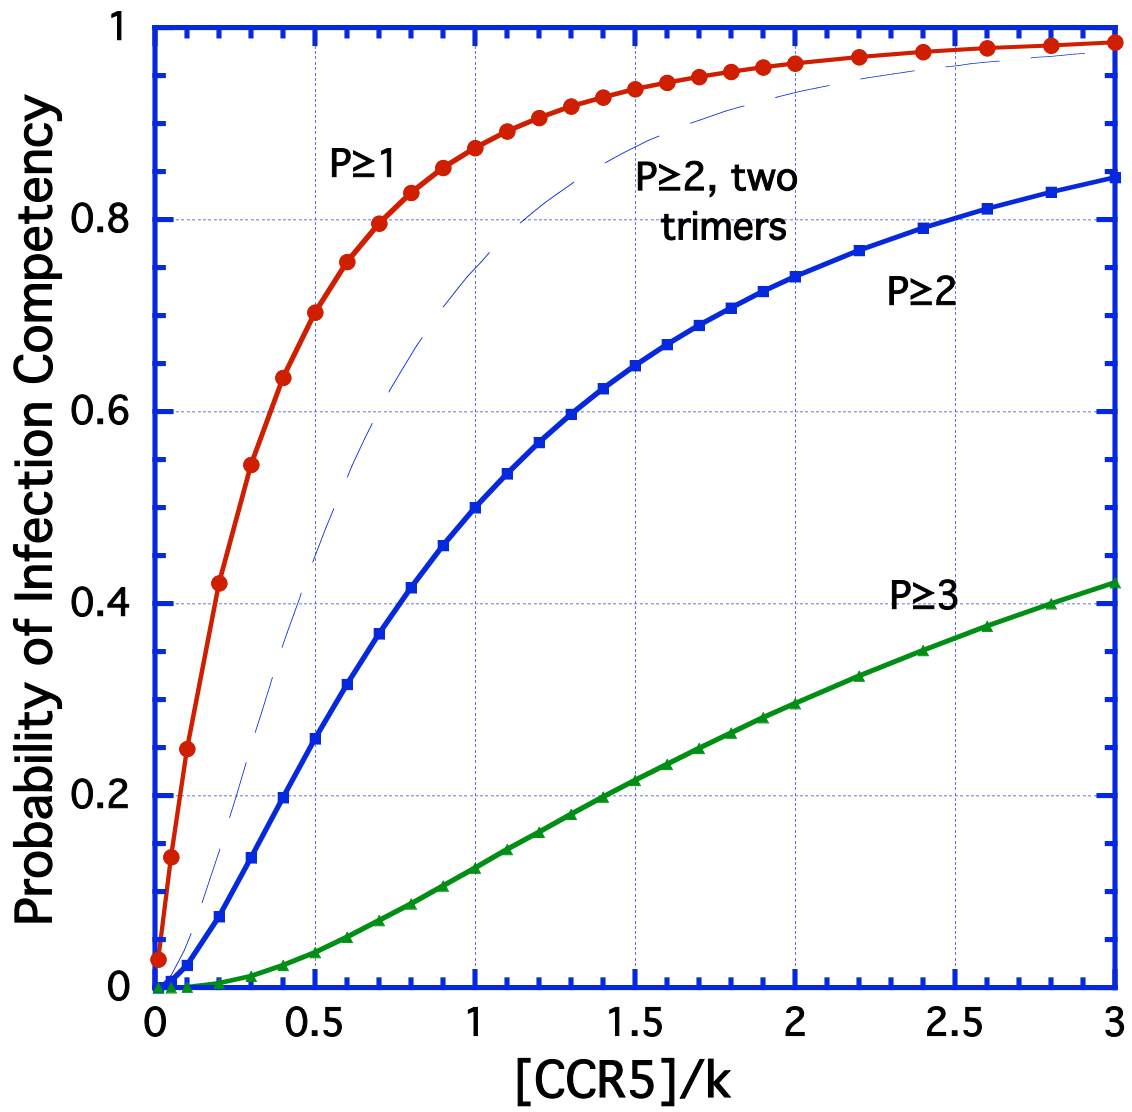

Supplement: NIHMS33674-supplement-04.pdf [file NIHMS33674-supplement-04.pdf]

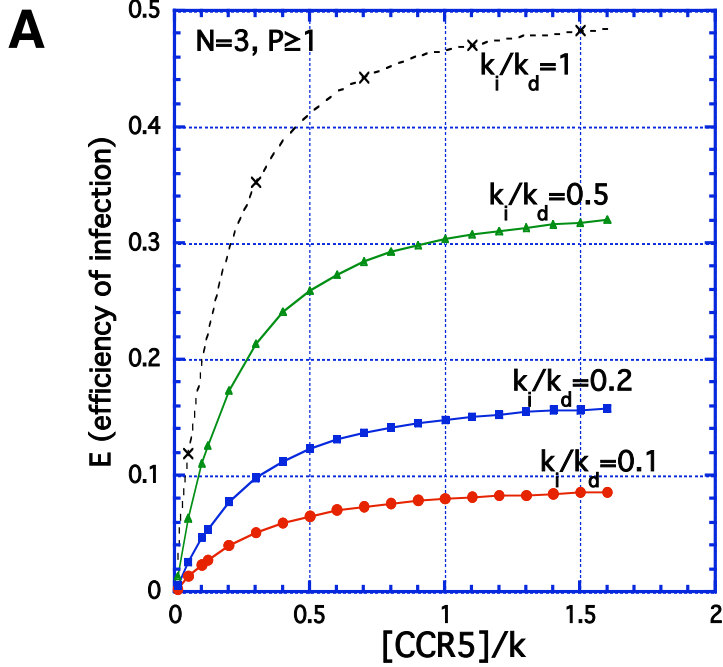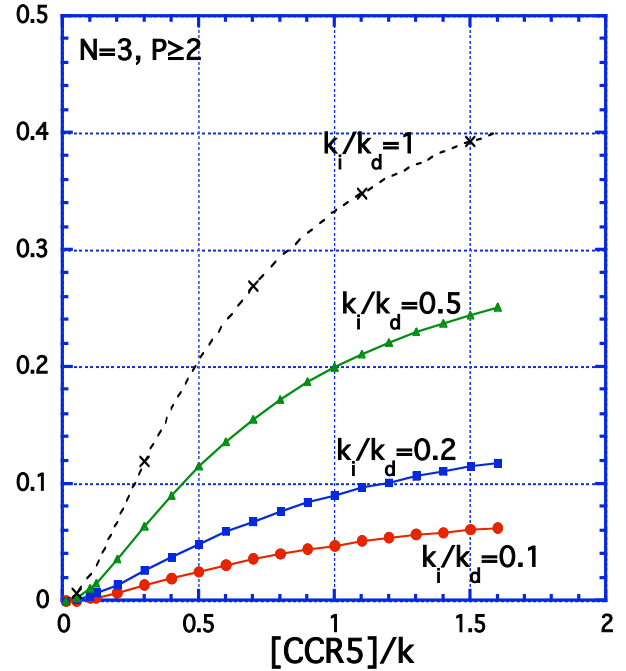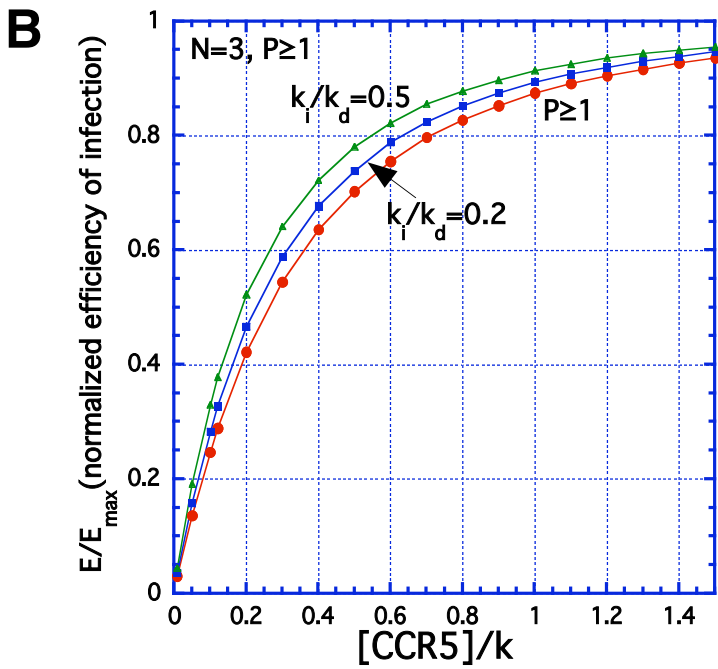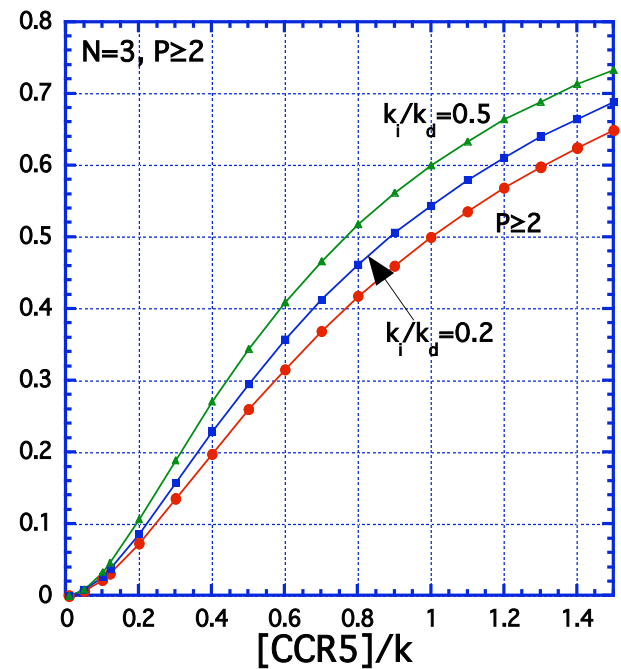

Supplement: NIHMS33674-supplement-05.pdf [file NIHMS33674-supplement-05.pdf]
